# Supplementary material
Source: Springer Nature journal article supplement (https://www.springermedizin.de/resource/supplementary/12998_2011_58_MOESM13_ESM.pdf/9680054)

**A**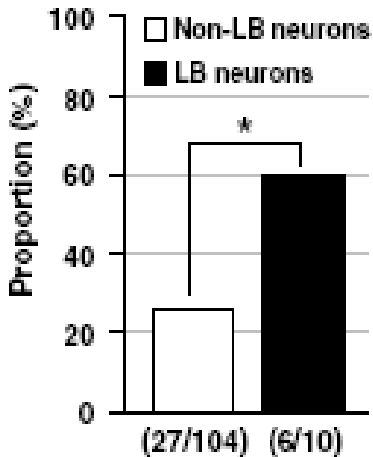**B**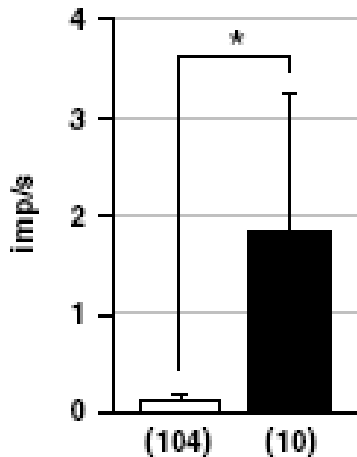

Supplement: MOESM13 [file 9680054]
